# Supplementary material for: Genome-wide identification and characterization of the soybean SOD family during alkaline stress
Source: PeerJ. 2020 Feb 5;8:e8457. doi: 10.7717/peerj.8457 (PMC7007734; doi:10.7717/peerj.8457)
Supplement: Supplemental Information 2 [file peerj-08-8457-s002.xls]

## Sheet: Sheet2
		ABRE	MeJA	SA	GA	MBS	Defense and Stress
	GmMSD1	3	4	0	0	3	0
	GmMSD2	0	2	0	0	1	0
	GmFSD1	2	2	1	0	0	0
	GmFSD2	4	1	1	1	0	0
	GmFSD3	4	2	1	0	0	0
	GmFSD4	3	2	0	3	0	0
	GmFSD5	2	0	1	0	0	0
	GmCSD1	2	4	1	2	1	1
	GmCSD2	1	6	0	0	0	1
	GmCSD3	2	4	1	0	0	4
	GmCSD4	3	6	0	1	2	0
	GmCSD5	1	0	0	2	0	1
	GmCSD6	3	0	0	2	2	3
