# Supplementary material for: Genome-wide identification and characterization of the soybean SOD family during alkaline stress
Source: PeerJ. 2020 Feb 5;8:e8457. doi: 10.7717/peerj.8457 (PMC7007734; doi:10.7717/peerj.8457)
Supplement: Supplemental Information 3 [file peerj-08-8457-s003.xlsx]

## Sheet: 1
				Early-maturation stage whole seed	Mid-maturation stage whole seed	Late-maturation stage whole Seed	Dry whole seed	Leaf	Root	Stem	Floral bud	Seeding
MSD	Glyma.04G221300	Glyma04g39930	GmMSD1	12.672	6.04164	4.19733	8.25739	11.3842	10.7591	10.1874	11.4205	11.268
	Glyma.06G144500	Glyma06g14960	GmMSD2	12.3106	4.97172	4.41231	9.0607	11.6325	10.3129	9.52748	10.8842	10.6662
Fe-Mn	Glyma.10G193500	Glyma10g33710	GmFSD3	12.6255	3.44788	-1.91151	4.80735	7.74819	12.6695	13.1157	11.7768	6.80735
	Glyma.20G196900	Glyma20g33880	GmFSD5	13.2403	5.09779	0.332671	5.72792	8.94544	11.6671	12.9198	11.6384	6.26679
	Glyma.02G087700	Glyma02g09630	GmFSD1	9.28077	1.53849	2.51351	7.71425	10.2046	7.35755	6.42626	8.61839	8.2384
	Glyma.10G117100	Glyma10g22680	GmFSD2	7.31288	-0.379151	1.44071	5.85798	8.21432	5.9542	5.55459	7.01123	6.58496
	Glyma.20G050800	Glyma20g12510	GmFSD4	9.35315	1.72016	2.8815	8.35755	9.84078	7.24793	6.10852	8.97441	8.42206
Cu-Zn	Glyma.16G153900	Glyma16g27020	GmCSD5	8.57743	2.68517	3.7344	8.45121	8.29462	7.74819	6.08746	8.29462	8.77808
	Glyma.03G242900	Glyma03g40280	GmCSD1	12.2796	6.63357	6.31777	12.0458	13.0019	10.8025	7.37504	12.5132	13.006
	Glyma.12G178800	Glyma12g30260	GmCSD4	6.6865	-1.09445	0	0	9.77808	4	3.70044	8	8.65105
	Glyma.12G081300	Glyma12g08650	GmCSD3	10.5641	3.49255	2.88425	7.10852	12.8597	8.28077	6.39232	10.2058	10.5147
	Glyma.19G240400	Glyma19g42890	GmCSD6	11.4615	6.13863	5.83789	10.7117	12.2213	10.0634	7.5157	11.7678	11.3896
	Glyma.11G192700	Glyma11g19840	GmCSD2	10.6493	4.50753	4.42406	10.1935	12.8853	8.37504	6.58496	10.3902	11.0519
