# Supplementary material for: Genome-wide identification and characterization of the soybean SOD family during alkaline stress
Source: PeerJ. 2020 Feb 5;8:e8457. doi: 10.7717/peerj.8457 (PMC7007734; doi:10.7717/peerj.8457)
Supplement: Supplemental Information 4 [file peerj-08-8457-s004.xlsx]

## Sheet: Sheet1
							roots			leaves
		alkaine 1 h	alkaine 3 h	alkaine 6 h	alkaine 12 h	alkaine 24 h	NaCl 1 h	NaCl 6 h	NaCl 12 h	NaCl 12 h	Cold 1 h	Cold 24 h
	GmMSD1	-0.118092	-0.0518952	-0.0498364	0.305672	0.454196	0.781859	0.588142	0.126259	-0.0639683	0.0382797	0.136616
	GmMSD2	-0.376769	-0.587169	-0.510195	-0.104986	0.132271	0.119093	-0.161927	0.310037	0.207584	-0.0166823	0.0177057
	GmFSD3	0.0752876	-0.545615	-0.361676	1.30075	1.66194	-1.48908	-1.08263	-0.894032	1.20414	0.263067	-0.637243
	GmFSD5	0.359608	-0.109855	-0.12831	1.28267	1.78485	-1.69847	-0.727064	-1.08874	1.27278	0.277431	-0.403879
	GmFSD1	-0.128805	0.549589	-0.750994	0.62688	0.764093	0.243434	-0.347155	-0.223747	0.965451	0.0629152	-0.340896
	GmFSD2	-0.757817	-3.20035	-1.71278	-0.820435	-1.1776	-0.471476	-0.462019	-0.407306	0.579802	-0.0551616	0.860485
	GmFSD4	0.526277	0.341545	0.369784	0.262232	-0.925216	-0.202311	-0.623636	-0.451237	0.888134	-0.0212994	0.144271
	GmCSD5	0.241181	-0.940168	-0.486911	0.820751	1.22895	-0.287974	0.459673	0.301618	1.48219	-0.07275	-0.175559
	GmCSD1	-0.308592	-0.503009	-0.0906201	-0.746803	-0.862131	-0.0258066	0.0423768	0.2947	0.0239027	-0.420198	-0.424708
	GmCSD4	-1e-05	-1e-05	-1e-05	-1e-05	-1e-05	-0.606242	0.706996	0.608344	-1.91934	-0.399874	-0.151511
	GmCSD3	-0.387349	-0.436743	-0.623673	-0.454292	-0.619053	0.142619	-0.176654	0.0456038	2.01266	-0.617323	-0.286052
	GmCSD6	-0.569682	-0.342086	-0.0122422	-0.0401382	-0.216829	-0.0511551	0.125653	0.425631	0.0293012	-0.151426	-0.0399721
	GmCSD2	-0.638572	-0.793285	-0.21633	-0.616524	0.0756924	-0.217017	-0.454635	0.117787	1.67546	-0.446312	-0.254638
