# Supplementary material for: Genome-wide identification and characterization of the soybean SOD family during alkaline stress
Source: PeerJ. 2020 Feb 5;8:e8457. doi: 10.7717/peerj.8457 (PMC7007734; doi:10.7717/peerj.8457)
Supplement: Supplemental Information 5 [file peerj-08-8457-s005.xls]

## Sheet: Sheet1
	Expression analysis of SOD genes in response to alkaline treatment in soybean leaves
		Average expression			Stdeva			T-text
		0 h	6 h	12 h	0 h	6 h	12 h	0 h	6 h	12 h
	GmMSD1	1	2.28641	1.67111	0	0.258551	0.2071	0	0.0131991	1.37667
	GmMSD2	1	1.28949	1.44459	0	0.26636	0.293138	0	0.200485	0.11949
	GmFSD1	1	0.880557	1.26068	0	0.351312	0.128007	0	0.615592	0.0478493
	GmFSD2	1	1.47129	1.07901	0	0.191893	0.268834	0	0.0510647	0.864688
	GmFSD3	1	0.944908	1.21986	0	0.120579	0.250626	0	0.511677	0.268003
	GmFSD4	1	1.42254	1.22734	0	0.313497	0.204689	0	0.144698	0.194286
	GmFSD5	1	0.451296	0.616854	0	0.0551613	0.0452826	0	0.00335185	0.00462374
	GmCSD1	1	1.90988	1.69816	0	0.197652	0.371536	0	0.0153678	0.0441007
	GmCSD2	1	2.20114	1.09976	0	0.200774	0.120269	0	0.00918521	0.287347
	GmCSD3	1	2.23055	1.3642	0	0.231238	0.3953	0	0.0115668	0.251603
	GmCSD4	1	3.0726	3.53638	0	0.211422	0.30986	0	0.00172977	0.00247819
	GmCSD5	1	2.76084	2.59927	0	0.375261	0.702763	0	0.014804	0.0307079
	GmCSD6	1	1.00302	1.19059	0	0.0824818	0.0603708	0	0.0824818	0.0603708

## Sheet: Sheet2
	Expression analysis of SOD genes in response to alkaline treatment in soybean roots
		Average expression			Stdeva			T-text
		0h	6h	12h	0h	6h	12h	0h	6h	12h
	GmMSD1	1	0.835261	0.356019	0	0.342379	0.118735	0	0.359789	0.00561806
	GmMSD2	1	0.837991	0.462585	0	0.274428	0.153847	0	0.285064	0.013385
	GmFSD1	1	0.619554	0.234461	0	0.241106	0.0146996	0	0.060889	6.14449e-05
	GmFSD2	1	0.590879	0.392409	0	0.0403687	0.00875033	0	0.00161875	3.45663e-05
	GmFSD3	1	3.82818	2.45054	0	0.434366	0.403525	0	0.00390837	0.012654
	GmFSD4	1	1.4935	0.72854	0	0.145803	0.112035	0	0.0142383	0.0272343
	GmFSD5	1	4.11685	2.79006	0	0.192628	0.108688	0	0.00063598	0.000613869
	GmCSD1	1	0.940435	0.451258	0	0.0842381	0.0691761	0	0.225403	0.00263817
	GmCSD2	1	0.475161	0.168629	0	0.0816879	0.0123039	0	0.00401321	3.65023e-05
	GmCSD3	1	0.792144	0.344712	0	0.245779	0.0337367	0	0.174107	0.000441469
	GmCSD4	1	0.961884	0.475394	0	0.159089	0.197638	0	0.61671	0.0228475
	GmCSD5	1	0.266254	0.131707	0	0.0164324	0.0252772	0	8.35806e-05	0.000141216
	GmCSD6	1	0.752226	0.487719	0	0.140746	0.0634065	0	0.0497961	0.00254355
