# Supplementary material for: Genome-wide identification and characterization of the soybean SOD family during alkaline stress
Source: PeerJ. 2020 Feb 5;8:e8457. doi: 10.7717/peerj.8457 (PMC7007734; doi:10.7717/peerj.8457)
Supplement: Supplemental Information 6 [file peerj-08-8457-s006.xls]

## Sheet: Sheet1
Seq 1	Seq 2	Ks	Ka
GmMSD1	GmMSD2	0.0134	0.0188
GmMSD1	GmFSD1	0.9167	0.7056
GmMSD1	GmFSD2	1.0389	0.6924
GmMSD1	GmFSD3	0.824	0.5702
GmMSD1	GmFSD4	1.0627	0.8109
GmMSD1	GmFSD5	0.8036	0.5893
GmMSD1	GmCSD1	1.2826	1.2055
GmMSD1	GmCSD2	0.9632	1.1425
GmMSD1	GmCSD3	0.9881	1.1667
GmMSD1	GmCSD4	1.139	1.2083
GmMSD1	GmCSD5	1.2325	1.3877
GmMSD1	GmCSD6	1.3028	1.2187
GmMSD2	GmFSD1	0.9533	0.6987
GmMSD2	GmFSD2	1.0832	0.6857
GmMSD2	GmFSD3	0.8345	0.5764
GmMSD2	GmFSD4	1.1114	0.7925
GmMSD2	GmFSD5	0.8137	0.5957
GmMSD2	GmCSD1	1.3056	1.2376
GmMSD2	GmCSD2	0.9405	1.1677
GmMSD2	GmCSD3	0.9643	1.1925
GmMSD2	GmCSD4	1.1114	1.2356
GmMSD2	GmCSD5	1.2771	1.396
GmMSD2	GmCSD6	1.3261	1.2515
GmFSD1	GmFSD2	0.0516	0.0547
GmFSD1	GmFSD3	0.1344	0.1544
GmFSD1	GmFSD4	0.6835	0.5473
GmFSD1	GmFSD5	0.1671	0.1595
GmFSD1	GmCSD1	1.4629	1.2043
GmFSD1	GmCSD2	1.8335	1.1504
GmFSD1	GmCSD3	1.6693	1.1732
GmFSD1	GmCSD4	1.5444	1.1905
GmFSD1	GmCSD5	2.0277	1.386
GmFSD1	GmCSD6	1.4533	1.2825
GmFSD2	GmFSD3	0.2076	0.1587
GmFSD2	GmFSD4	0.725	0.5248
GmFSD2	GmFSD5	0.1857	0.173
GmFSD2	GmCSD1	1.9341	1.2304
GmFSD2	GmCSD2	1.8518	1.1836
GmFSD2	GmCSD3	1.7787	1.195
GmFSD2	GmCSD4	1.8322	1.1524
GmFSD2	GmCSD5	1.8144	1.3914
GmFSD2	GmCSD6	1.9316	1.3294
GmFSD3	GmFSD4	0.6333	0.4932
GmFSD3	GmFSD5	0.0147	0.0371
GmFSD3	GmCSD1	1.4849	1.0687
GmFSD3	GmCSD2	1.6909	1.087
GmFSD3	GmCSD3	1.6061	1.0545
GmFSD3	GmCSD4	1.7662	1.05
GmFSD3	GmCSD5	2.0538	1.2004
GmFSD3	GmCSD6	1.4909	1.113
GmFSD4	GmFSD5	0.6538	0.4888
GmFSD4	GmCSD1	2.1751	1.3575
GmFSD4	GmCSD2	1.537	1.2697
GmFSD4	GmCSD3	1.452	1.267
GmFSD4	GmCSD4	1.7091	1.3036
GmFSD4	GmCSD5	n.a.	1.4433
GmFSD4	GmCSD6	2.2089	1.3742
GmFSD5	GmCSD1	1.6549	1.0447
GmFSD5	GmCSD2	1.4821	1.0987
GmFSD5	GmCSD3	1.4132	1.0655
GmFSD5	GmCSD4	1.6514	1.0609
GmFSD5	GmCSD5	1.8905	1.2333
GmFSD5	GmCSD6	1.6581	1.0877
GmCSD1	GmCSD2	0.409	0.5589
GmCSD1	GmCSD3	0.3831	0.5134
GmCSD1	GmCSD4	0.3759	0.4875
GmCSD1	GmCSD5	0.3165	0.4525
GmCSD1	GmCSD6	0.0266	0.0581
GmCSD2	GmCSD3	0.0699	0.0538
GmCSD2	GmCSD4	0.2052	0.2253
GmCSD2	GmCSD5	0.3557	0.6735
GmCSD2	GmCSD6	0.3761	0.5798
GmCSD3	GmCSD4	0.127	0.2131
GmCSD3	GmCSD5	0.3643	0.6233
GmCSD3	GmCSD6	0.351	0.5327
GmCSD4	GmCSD5	0.3848	0.5916
GmCSD4	GmCSD6	0.3875	0.4845
GmCSD5	GmCSD6	0.3085	0.5059
