# Supplementary material for: Genome-wide identification and characterization of the soybean SOD family during alkaline stress
Source: PeerJ. 2020 Feb 5;8:e8457. doi: 10.7717/peerj.8457 (PMC7007734; doi:10.7717/peerj.8457)
Supplement: Supplemental Information 7 [file peerj-08-8457-s007.xlsx]

## Sheet: Sheet1
		leaf 30min	leaf 1 h	leaf 2 h	leaf 3 h	leaf 5 h	root 30min	root 1 h	root 2 h	root 3 h	root 5 h
	GmMSD1	0.233306	0.0494923	-0.0336502	-0.446903	-0.354206	-0.00252043	-0.111464	-0.068764	-0.33391	-0.23757
	GmMSD2	0.295889	0.173699	-0.150124	-0.41153	-0.47843	-0.13887	-0.114263	-0.161901	-0.444117	-0.475746
	GmFSD3	-0.020886	0.0860146	0.0220304	-0.391864	-0.331489	-0.336308	-0.255982	-0.36064	-0.666847	-0.623583
	GmFSD5	0.0430255	0.0875471	0.080138	-0.383888	-0.320124	-0.301447	-0.157544	-0.235282	-0.640962	-0.431981
	GmFSD1	-0.220548	-0.206662	-0.663466	-1.34627	-1.69983	-0.102633	-0.0176138	-0.0726072	-0.132861	-0.303817
	GmFSD2	-0.876661	-0.554637	-0.107524	-0.876335	-0.779326	-0.628912	0.179961	-0.441862	-0.417484	-0.312556
	GmFSD4	-0.0704499	-0.65831	-0.925103	-1.3645	-1.32982	-0.0122491	-0.166651	-0.456399	-0.761448	-0.849645
	GmCSD5	0.189428	0.0667836	0.320209	0.0506602	-0.607569	-0.202256	-0.263559	-0.409024	0.185169	0.177019
	GmCSD1	0.0218931	-0.111037	0.218764	-0.111544	-0.494485	-0.51317	-0.283477	-0.158061	-0.122001	-0.231454
	GmCSD4	-0.863218	-0.385854	-0.495548	-0.757624	-2.2365	0.227644	0.682334	0.255318	0.079349	-0.206912
	GmCSD3	-1.2375	-0.825854	-0.928091	-1.47374	-3.40472	0.0248283	0.0724409	-0.0671577	-0.704666	-0.387522
	GmCSD6	-0.00292985	-0.204222	0.0928542	0.0663624	-0.575084	-0.350053	-0.211406	-0.136938	-0.0902586	-0.207907
	GmCSD2	-0.632388	-0.360757	-0.251125	-0.970408	-1.52515	-0.175339	-0.185614	-0.167597	-0.0766556	-0.040286
