# Supplementary material for: Genome-wide identification and characterization of the soybean SOD family during alkaline stress
Source: PeerJ. 2020 Feb 5;8:e8457. doi: 10.7717/peerj.8457 (PMC7007734; doi:10.7717/peerj.8457)
Supplement: Supplemental Information 10 [file peerj-08-8457-s010.xls]

## Sheet: Sheet2
Table S3. The information of putative cis-acting elements in SOD promoters from soybean.
Name	cis-acting elements	Description	Location and Strand of cis-acting elements
			GmMSD1		GmMSD2		GmFSD1		GmFSD2		GmFSD3		GmFSD4		GmFSD5		GmCSD1		GmCSD2		GmCSD3		GmCSD4		GmCSD5		GmCSD6
ABRE	GGTCCAT/AACGAC	cis-acting element involved in the abscisic acid responsiveness	1243 (-), 2465 (-), 2466 (-)		0		2710 (-), 2712 (-)		579 (+), 580 (+), 1724 (-), 2845 (-)		1416 (-), 1517 (-), 1754 (-), 2930 (+)		137 (-), 2750 (-), 2930 (+)		1284 (-), 1924 (-)		379 (-), 1157 (+), 2718 (+), 3010 (-)		636 (-)		1849 (-), 2447 (+),		1852 (+), 2888 (-), 2889 (+)		2030 (+)		822 (+), 1058 (+), 2743 (+)
MeJA	CGTCA/TGACG	cis-acting regulatory element involved in the MeJA-responsiveness	87 (+, GGTCA-motif), 1840 (+, GGTCA-motif), 87 (-, TCACG-motif), 1840 (-, TCACG-motif)		3 (+, GGTCA-motif), 3 (-, TCACG-motif)		2512 (+), 2898 (+)		1968 (+, GGTCA-motif), 1968 (-, TCACG-motif)		1017 (+, GGTCA-motif), 1017 (-, TCACG-motif)		588 (+, GGTCA-motif), 588 (-, TCACG-motif)		0		191 (-, TCACG-motif), 191 (+, GGTCA-motif), 555 (-, TCACG-motif), 555 (+, GGTCA-motif)		288 (-, TCACG-motif), 288 (+, GGTCA-motif), 495 (-, TCACG-motif), 495 (+, GGTCA-motif), 2357 (-, TCACG-motif), 2357 (+, GGTCA-motif)		857 (+), 1340 (-), 3008 (-), 1849 (+)		775 (+, TCACG-motif), 775 (-, GGTCA-motif), 1337 (-, TCACG-motif), 1337 (+, GGTCA-motif), 1521 (-, TCACG-motif), 1521 (+, GGTCA-motif)		0		0
SA	GAGAAGAATA/CCATCTTTTT	cis-acting element involved in salicylic acid responsiveness	0		0		919 (-)		2364 (-)		2067 (-)		0		165 (-)		2251 (+)		0		2249 (+)		0		481 (-), 2257 (-)		0
GA	AAACAGA/CCTTTTG	gibberellin-responsive element	0		0		0		2070 (-)		0		251 (-), 312 (-), 894 (-)		0		56 (-), 1170 (-)		0		0		11 (-)		0		808 (+), 840 (-)
MBS	CAACTG/CGGTCA/TAACTG	MYB binding site involved in drought-inducibility	160 (-), 603 (-), 2417 (-)		519 (-)		0		0		0		0		0		310 (+)		0		0		115 (+), 254 (+)		0		614 (-), 815 (-)
Defense and Stress	GTTTTCTTAC /ATTTTCTTCA /ATTTTCTCCA	cis-acting element involved in defense and stress responsiveness	0		0		0		0		0		0		0		2711 (+)		67 (-)		1594 (+), 2205 (-), 2213 (+), 2221 (+)		0		167 (-)		90 (-), 726 (-), 2736 (+)
